# Supplementary material for: Identification and Management of Comorbidities in Nursing Home Residents With Dementia: A UK-based Case Study
Source: Research Square preprint supplement (doi:10.21203/rs.3.rs-6523650/v1), 2025-06-04
Supplement: Supplementary file 1 [file 63f0966745f026d00806e686.docx]

**Supplementary Table 1**

*Theme and Subthemes from Thematic Analysis Identifying the Difficulties in Identifying and Managing Comorbid Conditions in Residents with Dementia*

| **Theme: Dealing with the Consequences of Dementia** |
| --- |
| Subtheme: Ensuring Day-to-Day Care to Residents with Memory Impairment |
| Sometimes you offer them [residents] food and they say no, […] then you have to explain that you [referring to the resident] haven't had lunch (participant 4 – care assistant). |
| We get the dosages [of medications] down to once a day or twice a day maximum to increase compliance because the more often doses are the more time someone has to self-medicate during a day, the more risk of them [residents with dementia] failing (participant 13 – informal caregiver). |
| Subtheme: Interacting with Residents with Limited Communication |
| Because of the dementia, they [residents] can't really always verbalize if they've had their bowels open or not and sometimes, it's hard to keep track of their bowels. And we've had situations where people have forgotten how many days it's been since they last opened their bowels and they've had like problems with being admitted to hospital only after we realized that the medical history showed that they had bowel obstructions (participant 10 - nurse). |
| Sometimes they [residents with dementia] don't understand you and you try to explain to them and it's very difficult for them and for us (participant 4 – care assistant). |
| Sometimes they [residents with dementia] might be frustrated over something and we don't know because they can't explain that to us (participant 4 – care assistant). |
| They [residents with dementia] cannot express their feelings. We have to understand their expressions (participant 3 – care assistant). |
| [referring to the lockdown during the COVID-19 pandemic] I did try some phone calls. I did ask if they [nursing home staff] could use a mobile [phone] so she [the resident] could see us [the informal caregiver and her husband], but actually I worked out it wasn't where she [the resident with dementia] was at. So […] I would take weekly photographs of myself or myself and my husband, and they'd be like big and I'd color print them and attach them to a card so goodness knows how many cards she got (participant 11 – primary informal caregiver). |
| Sometimes you're not very sure whether especially somebody with a bit more severe dementias, whether they are cognitively not understanding or whether they're not hearing (participant 12 – GP). |
| I think someone with dementia just doesn't tell you what's going on. They can't remember and they can't make sense of things. So you have to rely on witness statements and evidence. You have to become a bit of a Miss Marple. (participant 13 – informal caregiver). |
| She [the resident with dementia] can answer a direct question. Doesn't necessarily give the right answer, but she'll answer you, she will. She will confabulate. (participant 13 – informal caregiver). |
| Subtheme: Ensuring Safety to Residents Who May Not Be Aware of Their Impairments |
| I feel something much difficult is they forget to ask for help and try to do things by themselves, and they finally may fall down, or they may get bruises or something. So that's the thing that I feel they forget to ask for help and try to do things by themselves (participant 3 – care assistant). |
| Subtheme: Dealing with the Behavioral Issues of Dementia |
| So if they [residents] strictly say that they don't want to see this person [doctor/specialist] coming from mental health [to visit the resident], then, we don't try. So if they say they don't want to get involved, then obviously we will book another appointment [for the doctor] to see them. So it could be that that day it wasn't the perfect timing for the patient. (participant 10 – nurse). |
| It is challenging because they [residents with dementia] are not the same everyday (participant 1 - care assistant). |
| The behavioral aspects are the most difficult ones that we sort of struggle to manage and those are the aspects that we often would need help with. And certainly the nurses often would need help with that the most (participant 12 – GP). |
| Behavior is probably the biggest aspect and it's the most difficult to treat because even when it comes to medication, sometimes medications that we would use for behavioral control are quite invasive […] you don't want to put people on medication that could potentially make them wobbly or more unwell, or so forth and then create falls and infections and so forth (participant 12 – GP). |
| **Theme: Providing Geriatric Knowledge to Nursing Home Staff** |
| Without a little bit of knowledge and clinical background it would be very hard, I guess for some colleagues to identify this [referring to delirium] (participant 9 – manager). |
| I have never worked in a nursing home or care home before… I used to work in retail, and then obviously I had children and I was fortunate that I was able to be a stay-at-home mum. So it's when my youngest [child] became sort of an age where I felt happy to leave her for a couple of hours after school, that I applied for this job. The job center said it's perfect for you. You brought up children. You're organizing children and play times and play groups for them because it's very, very similar (participant 7 – wellbeing companion). |
| I would say that even though they [care assistants and nurses] obviously do understand and they usually know those residents who have dementia they probably don't always realize how extensive the effects of the dementia can be and also how certain symptoms might indeed relate. For example, I was talking about the sort of delirium aspect of dementia and we know when residents get relocated or come from hospital back to us and then nurses or care assistants, they might confuse that with more acute signs of infection (participant 12 – GP). |
| So over the years we've had some good nurses and some less good ones and you saw you have to kind of establish how much you trust their clinical acumen because if they are very clinically, very efficient and they're good and you trust what you hear, then you can sort of say well that's fine and keep an eye on whatever. If you're not quite sure, then you kind of want to go and see (participant 12 – GP). |
| I know that the length of the list [of residents to examine] depends also on who's [the nurse] taking me around. So if there's somebody like [name of a nurse] who again is clinically very good and knows the residents really well, I know that generally the list is going to be a little bit less, although this week it wasn't, but typically it would be; whereas those [nurses] who are a bit less confident, you tend to see more residents that time (participant 12 – GP). |
| When they [staff members] maybe need to improve on things. I'm very keen on doing lessons learnt discussions rather than really creating a blaming culture because people [staff members] will not learn anything from that (participant 9 – manager). |
| Over the years, they [nursing home staff members] are happy working there and sometimes I think perhaps you're [staff] a bit too happy for my comfort. Occasionally I think because you're not perhaps being told some of the things that you could develop and improve on (participant 11 – informal caregiver). |
| I did a workshop concerning geriatric care, where I talked to my staff about different types of conditions that elderly people might have and how that might impact how they are every day. For many staff, they didn't know [about geriatric care] and they found this very helpful (participant 9 – manager). |
| They [care assistants] can access on their device residents’ highlighted medical conditions but of course sometimes they wouldn't have the knowledge of what that condition might involve. So we [the manager and nurses] are always keen to provide different explanations. So when we do pre assessment we seek medical summary, but we also give people [staff members] a debrief of the person that might be coming to us and what the level of care might be required (participant 9 – manager). |
| It's the same course year after year after year [referring to training courses provided to staff members]. It's just a refresher, you do it that first time, then each year it's just to refresh you, but you know exactly what's coming up (participant 7 – wellbeing companion). |
| We don’t do many training courses in house and in person, which is a shame because I feel that we would learn so much more. Like if you could just discuss it within the group, you can have a laugh also, which I think is a great way to remember things (participant 7 –wellbeing companion). |
| She [the resident] was regurgitating meals so she would sit there, eat her meal, smile and then a whole lot will come back on her plate. And that's not really vomiting because there's it's like it just didn't get to her stomach because of what's going on in her gullet and her upper stomach. […]. That was a difficult thing because it needed to be properly communicated to the GP. What exactly was going on? But I think their [care staff] priority would be is she contagious? she did stay in her room because she's been sick and we don't want all the other […]. So sometimes it's just interpreting correctly what you're seeing, but I don't think they do it badly at all (participant 13 – informal caregiver). |
| I find our carers struggle, mainly, because when we do our nursing training for three years, we study psychology. We study how to deal with different difficult patients, clients, things like that. ..we know how to handle certain situations, whereas our carers, if they have training, it's different. They don't study psychology. They come into basic training to be a carer …. (participant 14 - clinical lead nurse). |
| We've got two new nurses that came from the Philippines… I don't think dementia is spoken about a lot in the Philippines as they were explaining. So obviously they were shadowing us [nurses] for six months to learn everything, but they had to do their training first before they come into work on the floor. So they read about dementia, they did the core that asked questions but at the same time, they're working with us while they're watching how we handle certain situations and how we deal with certain residents so that when they are the nurses in charge, they will know what to do (participant 14 - clinical lead nurse). |
| Most of our carers, especially the much younger carers, some of them have just left college or worked in the supermarket and never worked with people and obviously, what they know about dementia is one carer, I remember, she gave an example like, oh, I just got dementia if someone's just going crazy or mental (participant 14 - clinical lead nurse). |
| **Theme: Providing Services and Activities That Are Inclusive Towards Residents with Dementia** |
| [Answering to the researcher who asked whether people with dementia take part in group activities together with those without dementia]. They should be included in the activities which bring joy and I think we need to find a way to adapt as well…And also probably provide a bit of maybe education (participant 9 – manager). |
| It's still a very good home. I have no doubts about the intentions [of care assistants], but the delivery in terms of her [referring to her mother who resides in the nursing home] mood, I do wonder about that. They [staff members] offer things, but if she's not awake, she won't get to them (participant 11 – primary informal caregiver). |
| The television is always on. She was never a television person in that sense. I appreciate things change and that her home has been a nursing home for many, many years, so cultures change. She has a CD player, which I've supplied. She has CDs, but I've noticed I just don't see any evidence of them being on. And I bought her some music that I knew she used to love when I was a teenager at Christmas. And I told the carers [care assistants] about it and I don't know if the message just gets through. This is something that, yeah, this is going to go on forever. We're all human, etcetera, but I sometimes think are they really thinking about what [name of the resident] actually likes? Or is it just easier to put the television on or to think that she said yes to the television. She was a churchgoer, and I don't know if they actually offer to put a church service on which you can find on a channel on a Sunday in this country […]. I actually have to say I've given up. I have decided to give up advocating for her. That happened. That happened a while back (participant 11 – primary informal caregiver). |
| The [nursing] home had somebody who became a one-to-one person for her [the resident] […] I had really wanted this one-to-one person to stay on, and the matron did not want her to. And then I tried to employ her privately and that was blocked [due to nursing homes regulations] because my mother had really benefited from having somebody who got to know her, who could call her by her name and spend time for her (participant 11 – primary informal caregiver). |
| We [the daughter of the resident and her husband] waited an hour and a half before she “woke up” and she was just slumbering with her chin on her chest and she woke up. And we saw the opportunity and said: “would you like to go out into the garden?” and I don't remember if she said a word, but she assented. So we took her down in her wheelchair and outside into the garden, that is where she comes alive. Still she would touch the flowers gently and I might say something. She would lean over as much as she could […] I think that the way that she reacts to us and it's very, very different from obviously, care assistants, nurses. […]. I've realized it's not just about being down at her level physically and kneeling. And I can do that. That's fine. But it's just about being gentle and just waiting for a moment when she might come alive. So going out into the garden we'll stop and I'll just gauge if I think she's interested in the particular flower. But it does take time. You can't rush anybody. And it also takes less words rather than more and that's what I'm always saying to myself. And sometimes I say to my husband, don't be so complicated. It's simple offers something really simple and that's when we get the connection and just, I described the scene of going outside […] reflecting on it, I think there's something about she's free. She loves the wind. […] So I think it's about putting her in an environment where she perhaps feels we don't know. It might be more herself or something that she can relate to other than that (participant 11 – primary informal caregiver). |
| **Theme: Interacting with and Compensating for an Under-Sourced Healthcare System** |
| I think reduction in the [mental health] teams around us [referring to geographical location]. I think there is maybe also higher demands because there's more people needing such support. So clearly system can't cope and I think maybe this is the reason why people are not quickly enough diagnosed with dementia if they have symptoms and they are medically assessed until they actually come into the nursing home. And then when you [nursing home staff] notice those changes, we actually push towards diagnosis as well and a little bit of investigation because that helps with your plan of action (participant 9 – manager). |
| We continuously have to be the best advocate for residents, […] I think in [area where the nursing home is located], we've only been given two clinical specialist committees, mental health supports nursing homes where we know that we have so many residents in every care home that needs that level of support. I mean when we're waiting because there's that waiting time only what we can do really is to have regular dialogue with GP (participant 9 – manager). |
| So I was trying to look for any other people [specialists] that could come in and help us with the crisis that the resident was facing. It turned out that actually we have to deal with that crisis ourselves because they couldn't come [mental health specialists] because they don't. I think sometimes the barriers as well that when you work for the nursing home, there's an expectation that you have nurses and they can provide all the care; whereas, I think that expertise from community mental health practices would be very much important (participant 9 – manager). |
| It is very tricky to get them [residents] seen at home and even obviously getting referrals out to the hospital that can sometimes take several months (participant 12 – GP). |
| Some of the Community nursing services like Parkinson's nurses do visit [residents in the nursing home] and we do kind of rely on them, but getting sort of consultant reviews can be difficult (participant 12 – GP). |
| We can seek advice and guidance from specialists. Sometimes, instead of setting a referral, we send them [to specialists] a letter saying these are the issues and this [is] what we suspect is going on. Are there certain things that we can do whilst they [residents] are waiting to be seen? So that's another way that we can get a little bit of advice when we can't get them to see [residents] more quickly (participant 12 – GP). |
| She has glaucoma or had glaucoma in one eye. So that was a nightmare. I don't know if either of you've got relatives who have to go to eye clinics or hospitals, but it's an absolute nightmare. Terrible. And you need, they say, allow three hours. They're not joking. I mean, it's a long, long, process. Now that became more and more stressful and I mean inhumane, for my mother with her dementia, because I couldn't explain to her anything. There are at least four different parts of the process before you see the doctor and then nothing changes and you go home and it's you think, oh, what was that all about? (participant 13 – informal caregiver). |
| I think you [GPs and other specialists] can't assess residents over the phone basically because not only they [residents] can't see you, they might not be able to trust you because they might get confused as well (participant 9 – manager). |
| We've had a gentleman who came… he became very aggressive, hitting the staff, hitting his own family, obviously when he got to that stage, they had to move him (participant 14 - clinical lead nurse). |
| **Theme: Being Aware of One’s Responsibility** |
| So I trained the staff in the correct ways to move and handle residents, whether it's from wheelchairs or from bed (participant 7 –wellbeing companion). |
| I believe that all our residents are required to see the GP every two weeks. […] In terms of sort of the unexpected death, if a doctor hasn't seen somebody who's died within two weeks that can potentially add additional complications and require coroner investigations and things like that (participant 8 – owner of the nursing home). |
| We need to find time to be able to be selfish towards ourselves and find a time to really offload. […] But also, being able to understand that there will be situations that I might not be able to resolve. I'm very much aware of the barriers of circumstances that sometimes I cannot overcome. So just being honest and transparent with yourself, I think and then finding, where are your limits and where you need to seek support and resources certainly helps (participant 9 – care home manager). |
| I actually have to say I've given up. I have decided to give up to try and advocate for her [referring to the mother who resides in the nursing home] that happened a while back (participant 11 – informal caregiver). |
| It is tricky because although we've got LPA [lasting power of attorney] in place for Mum's health and welfare as well as finance, you do really abdicate quite a lot of that (participant 13 – informal caregiver). |
| We'll let the nurse [know] because we don't deal with these things (participant 3 – care assistant). |
| Residents, family, you know everything, our health as well. It's not easy to balance everything together, to be honest (participant 1 – care assistant). |

**Supplementary Table 2**

*Theme and Subthemes from Thematic Analyses Identifying What Facilitates Identification and Management of Comorbid Conditions in Residents with Dementia*

| **Theme: Undertaking a Holistic Approach of Care** |
| --- |
| Definitely looking first at a person as a whole because I think that often can be missed if we're looking just at the problem, isn't it? Problem might not be evident. So looking into residents body language and sometimes I can check as well: is this person eating well? Have we noticed any changes yesterday or this is out of the character today? (participant 9 – manager). |
| The reality of the fact that the care that we provide in the most sort of holistic sense incorporates the family (participant 8 – owner of the nursing home). |
| In psychologist time for mental health, we're not doing just personal care. We have to deal with their disability and all the time it is mentally and physically. This job is not just physically all the time because we have to be there with them in the morning, the activity groups (participant 1 – care assistant). |
| We would take a much more holistic approach and focus more on that person's well-being and comfort, for example, rather than necessarily think about prolonging life by having all those extra treatments and extra medications (participant 12 – GP). |
| She in a year, she [referring to a nursing home resident] had over a hundred falls. No matter what you said to her, she would still get up. She would still try to watch the plants and then she would fall back. So everybody was involved … a community team with the physios … (participant 14 – clinical lead nurse). |
| **Theme: Ensuring Continuity of Care** |
| I think the level of care 24/7 support that we see those residents every single day certainly helps to identify when something is not right (participant 9 – manager). |
| When I was working for an agency, I didn’t know the residents because in the morning I would be going to different homes. I didn’t know what was happening with those [residents]. […] But here I know the routine, I know the residents. I can understand from their face whether they are upset or depressed or something else because I'm spending 12 hours here. So I feel it's easy for me to understand them (participant 3 – care assistant). |
| This doctor who visits every week […] I think it benefits the residents and it clearly took away all sorts of grey area complications for the surgery. That means that everyone [residents] receives a service that they're kind of expecting and I think it's probably a lot easier for the surgery to manage [referring to the GP that visits the nursing home every week] (participant 8 – nursing home owner). |
| Doing those sorts of more general reviews kind of every couple of weeks […]. Those ones are quick […]. I have a very good continuity with the patients [residents] and I know them and I know if they become a bit more poorly, I have a bit of an idea of who we should be perhaps escalating the treatment and who are not for escalation of treatment (participant 12 – GP). |
| A lot of the times when families realize that the person doesn't have to be transferred to a hospital or Hospice for the end-of-life care, then they are really grateful for that. There's nothing worse than being in hospital and dying in hospital. I mean, that's a horrible place to die. And actually, even from the hospital point of view, they don't want to keep people in. So, I mean, we know that, we've had a few residents who in the past have been admitted because they had a stroke or something like that and they were very much obviously end-of-life. Then they try to discharge them back to the nursing home for that end-of-life care (participant 12 – GP). |
| We have hourly cheques in place. So our staff members are always vigilant and […] they maintain a strict documentation (participant 10 – nurse). |
| So our GP is aware that we need to have medication reviews 6 monthly. And sometimes it's not done promptly, but it gets done by our GP (participant 10 – nurse). |
| One of the things that one does on a fairly regular basis is keep an eye on on the medication. […] I think the nursing home is sort of taking the stands that we should have a bit of a review of everybody every couple of weeks. I often take that opportunity then to, sort of just check on what's happening with their medications (participant 12 – GP). |
| She managed independent living, but then she had an acute bowel upset. [...] Certainly the one thing none of us wanted was our relatives to go into hospital because we would not have been able to visit her, with her dementia that would have been really very difficult. […]. She couldn't manage in the independent living but there wasn’t an acute bed in the in the nursing home and thankfully, the [owners of the nursing home], helped us find her a room and they were able to nurse her medical needs, which, which was quite difficult when you've got someone with dementia who doesn't know when to go to the lavatory but needs to go to the lavatory, doesn't remember to call somebody to help her. […] The good news is she got a lot better. She got over her acute bowel situation and things settled down again, but it was abundantly obvious that she couldn't go back into independent living, and she'd really probably been living on a tightrope anyway, so that was just the final straw. And that's when she became a nursing home resident (Participant 13 – informal caregiver). |
| If someone calls sick, we get agency, we tend to get the same people from the same agency, so there's continuing to care. So most of our agency nurses and carers that come here to cover sickness and holiday have been coming here for the last five, ten years. It's very rare that we get new agency staff unless we have to, but our manager tries to recruit our own staff and it’s the same people. (Participant 14 – clinical lead nurse). |
| **Theme: Providing Personalized Care** |
| Subtheme: Adjusting Based on Individuals’ Needs |
| There's a lot of rooms that have got people's own furniture in them, which must be really comforting (participant 6 – wellbeing companion). |
| We've got one [resident] that is completely deaf and she's using a special app with the tablet (participant 9 – manager). |
| I've given up with regard to the nursing home, about her [residents’] glasses. They [nursing home staff] don't really get it. I find she's got a pair of sunglasses which she needs, but she gets lots of sun in her room. You'd think they put them on, huh? But no. And they [glasses] are always filthy. And I just think I don't know what to do. I've tried this. So I just don't know whether she's being attended in terms of her eyesight or not (participant 11 – informal caregiver). |
| We've implemented here meaningful moments. So there's a special section in our care plan devices, let's say where any form of interaction that we think is meaningful for the residents, our staff will record it and that helps us as well to see what actually helps residents to be stimulated, because sometimes maybe what looking for the photo frames or being outdoor makes a world of good and difference to them (participant 9 – manager). |
| We should try our best really to see how we can adapt our ways of working to support that individual. There is no protocol (participant 9 – manager). |
| She'd lived there with my father. She moved to this tiny room, which is right next to the Nurses Office, which is really good and because she can get up during the night and she's not safe, so they can hear her (participant 11 – primary informal caregiver). |
| [Referring to the severe osteoarthritis her mum has] they've [nursing home staff] said, can you try and choose clothing we can just pull on over her head and pull off. No buttons, no fancy zippers, and same with trousers skirts going to the loo. You know, you don't get things with zippers and buttons and things. Can we just have pull ups and pull downs? So they were very helpful with that (participant 13 – informal caregiver). |
| Subtheme: Involving Residents in Decision Making |
| We have resident led afternoon so we will ask what they would like to do [referring to group activities] (participant 5 – wellbeing companion). |
| They [residents] were choosing music they want to hear, so we have a big screen, and they were able to watch videos off YouTube (participant 6 – wellbeing companion). |
| So the people [doctors] come here [at the nursing home] and they do eye tests for the residents. They come quite a lot, but some of the residents prefer to go to their own places [doctors/clinics] where they used to go before, especially the ones that got the capacity (participant 4 – care assistant). |
| Obviously if the person [resident] is able to take part in that conversation, then I don't necessarily feel that needs to go through the family (participant 12 – GP). |
| Those who have earlier onset of dementia for example who can still sort of communicate their wishes […] you can obviously discuss that [planning end-of-life treatments] a little bit more (participant 12 – GP). |
| So before we admit anyone to [nursing home], we do what's called a preassessment. So through that preassessment, either with the family involving the resident, if the resident is able to communicate, or just with the family, they give us history of their mom or their dad. What they used to buy, what their hobbies were, what they don't like, what they like to eat or they don't like to eat. So we have all that information and then when they come in, then we get the full information they don't like music. They don't like this. They don't like that list, they don't like doing. So then they activities are based on what they like. (Participant 14 - clinical lead nurse). |
| **Theme: Effective Interdisciplinary Collaboration** |
| Subtheme: Communicating with Residents’ GPS and Other Specialists |
| We would ask the community mental health and we would ask our GP as well to get involved. So the community mental health would come here and then they would assess the situation. If they prescribe something then the letter has to go to the GP and then the GP will prescribe the medication […]. The community mental health nurse would come, and he would make like a plan and he would give us indication about when this resident is in the green, amber and red zone (participant 10 – nurse). |
| I usually expect to get about 4-5 emails a day about various things. I mean, sometimes it's just about a person’s medication or so, but they [nurses] will e-mail me during the week about more acute things, like if they suspect that somebody might have a urine infection and those sorts of things. Of course, if they have much more acute things, then they get in touch. They usually ring the surgery and get hold of me. Or if I'm not at the surgery, then they'll obviously speak to whoever's on duty on that day (participant 12 – GP). |
| More recently we've had some input from community pharmacists. We have a community pharmacist who's with us at the surgery, and they've been doing some of those more complex medication reviews (participant 12 – GP). |
| Subtheme: Communicating with Other Nursing Home Staff Members |
| So there's two handovers basically morning with night people and the day nurses and same in the evening the day staff is giving her hand over to the night staff. So I think that communication is very, very important. I cannot see the situation that you're coming in on the floor after a few days off and then just going straight to work. You know, things might change, isn't it? Someone might be on the way or, you know, there is a significant event (participant 9 – manager). |
| We stop the nurses here all the time. We talk to one another and that sort of thing (participant 4 – care assistant). |
| If I ask one of the residents would you like to do something or would you like to have something? She says no and I let my colleagues know I have asked her. Maybe you can try and ask her later. So it's just basically more communication between us [care assistants] (participant 3 – care assistant). |
| We do all sort of brainstorm together [referring to the manager] (participant 5 – wellbeing companion). |
| So you get the nurse come and have a look at them [agitated residents] and that sort of thing, and we'll write it down as well (participant 4 – care assistant). |
| So if we have any concern related to the medicine or something like that, we will directly inform to the nurses. They'll come and look and they'll start the medication details. If we think the urine is very strong and smelly and it looks yellowish, darker yellowish, we'll let the nurse [know] because we don't deal with these things. So we'll let them [the nurses] know that the urine's like that. So they tell us to get the urine sample so they will do and later on they'll say we have to monitor (participant 3 – care assistant). |
| Just basically working as a team and communication as it is obviously a big help (participant 2 – care assistant). |
| And every day at 10 o'clock we have what's called a team meet, so this is with all departments, Monday to Friday (participant 14 – nurse). |
| I do work closely with the nurses at [name of the nursing home]. And now that I've been here several years, they know me, they know what I do and they trust me and so that's very helpful. I always see them as soon as I get here [in the nursing home] for any updates, because I come in on a Wednesday and I'm probably not back in again until Monday and a lot can have happened and they will always update me and tell me if there's anything that I should know or somebody that would really appreciate a visit that afternoon (participant 15 - chaplain) |
| Subtheme: Communicating with Residents’ Informal Caregivers |
| Very shortly before my father died, I was told that a member of staff, driving behind my mother on the road near [the nursing home], and noticed that she was weaving. So one of the [owners of the nursing home] spoke to me and said we think you need to take the car away from her (participant 11 – primary informal caregiver). |
| I did have to make a complaint once to the manager and it was acted through and eventually not long after that person left (participant 11 – primary informal caregiver). |
| Each year there’s a review […] so I go and that would normally be with the lead nurse and my mother and her lead care assistant. And that’s when I do bring up things […] I don’t actually think that very much has changed even though I try (participant 11 – primary informal caregiver). |
| I was deeply involved with the psychologists who had to come, and we had to work out a whole plan. And there is an action sheet in her folder. It’s a folder which says what to do if things start to kick off for her (participant 11 – primary informal caregiver). |
| I was just thinking all I’m doing is speaking up for her, but I didn’t want. I’m not a rowdy, argumentative person. I didn’t go in, you know, blazing and so on. And I didn’t feel satisfied. And I just thought, I don’t know what else to do because it’s a very delicate thing. You’re paying for this and there is a contract and they are meant to be doing certain things, but of course it’s my mother who’s the subject. I’m giving them feedback and it’s an awkward relationship at times and a difficult one, quite a nuanced one […] I have power of attorney and so I can make decisions. I’m the one that pays for everything. So this whole thing about when there are complaints, you want to be in relationship. I want to be in relationship with these people. I don’t want to build up a negative profile (participant 11 – primary informal caregiver). |
| There’s the lead nurses like [name of a nurse], for example, or [name of a nurse] and so forth. They’re very good at discussing things with the families as well. And then if they [residents’ families] have any further questions I’m always quite happy to get in touch with the families themselves as well (participant 12 – GP). |
| I sent to her [referring to the nurse] [an email] and I just said: would you like to tell me about my mother’s comorbidities? So she sent me back this very long list, and I thought, Oh my goodness. And then the medications. I got to the end and I just thought I was in denial about it. I thought my goodness is that what’s keeping her alive? So she’s on a lot of medications. She has a whole load of comorbidities, but I have to tell you they aren’t something I’m aware of at all. And it isn’t something that’s spoken about. I mean, I had to ask (participant 11 – primary informal caregiver). |
| So he's [referring to the GP] been super and let me have his e-mail address and that has helped me. I haven't needed it very often but he's just given me that as access otherwise we would go through the nursing team (participant 13 – informal caregiver). |
| [referring to an annual review that takes place between the informal caregiver and the care team including the nursing home manager and the main care assistant of the resident] I've found that very helpful where we can sit down with two or three staff, Mum's personal helper care, the senior nurse, and usually [the nursing home manager] and just give me an update on how things are going and what so that I'm aware of (participant 13 – informal caregiver). |
| And I recently spoke to the person with which mum has been having physiotherapy to try and keep her mobile try and reduce her chance of falling. We reduced it to twice a month from weekly and then in the last review, the physiotherapist said your mum's not enjoying it, she's frightened, she doesn't want to participate. I'm only getting about 20 minutes and then she's had enough. And I said, I think we all have to call it quits. Now we've done what we can. She's actually now too frail and too scared of. She hasn't caught my mother, hasn't got the confidence really to participate, even in the exercises. And she doesn't understand any return, the gain. There is literally nothing in it for her. (participant 13 – informal caregiver). |
| We like to keep them informed. Say if their mum is refusing to bath or showers or it's just noncompliant, every day we send an email today we were successful. Mum had a bath and we take a picture we sent to them. She changed her dress today. Another day they know that it was not successful. We send them the email, so sorry, Mom didn't want a bath today. She didn't want to touch her hair. We're going to keep trying. And then by the end of the day, we give them another update that we succeeded, we manage to do it. And they like that. Initially they were like, oh, why are you always communicating with us? And I was like, well, if this was my mom, I would like to know how she is and where then I'll come I would be like “why is my mom looking so dirty and unkept?” (Participant 14 – clinical lead nurse). |
| I do remember a husband wanting me to say some prayers with his wife, who wasn't going to be with us much longer and I did. I think I went in on two occasions and he did say to me, I don't think she probably heard you well. Who knows? Who knows? You know. But sometimes you are bringing some comfort to the relatives as well (participant 15 – chaplain). |
| **Theme: Securing the Trust of Residents** |
| A relatively new resident here has had family who have been, let's say, so attentive that it's got to the point where we feel like even after a month, we haven't really been given a chance to win this gentleman's trust or to kind of form those relationships (participant 8 – owner of the nursing home). |
| I'll work at gaining their trust (participant 6 – wellbeing companion). |
| It's just things like reading some poetry if they've got a look generally through things around their rooms because if their relatives have, you know they have lots of their own personal effects in that. So I'll ask about photographs on the walls […] (participant 5 – wellbeing companion). |
| So we garden, sit there, I take pictures or try to film the garden and show it to some of the residents because they can't go there. So I'll try and bring the garden to them and [...] they will enjoy it (participant 4 – care assistant). |
| She likes the [owners of the nursing home]. She can relate to the [owners] socially  (participant 11 – primary informal caregiver). |
| People [staff working in the nursing home] are themselves there. And I do like that about [name of the nursing home] very much. The staff are themselves. And that's important because that's how you can build a relationship with residents (participant 11 – primary informal caregiver). |
| You do establish a rapport with the residents. You get to know them over the years (participant 12 – GP). |
| **Theme: Investing in Psychosocial Care** |
| Subtheme: Providing Psychosocial Activities |
| They [referring to residents] might say to me, or can you come and help me this afternoon to write a letter? Or can I help with an e-mail or a diary, see whether I've got appointments to go out on with. I can go with them. I can sit in their rooms. I can take in puzzles or games or coloring. We can watch TV together. If they're able bodied, I can take them out in the garden (participant 5 wellbeing companion). |
| We have a pat dog who comes in [the nursing home] (participant 5 wellbeing companion). |
| So she [referring to the chaplain] sees people and she provides Holy Communion to those that can't come down (participant 5 - wellbeing companion). |
| She [the resident] surprised all of us last year. She likes music, and she was at a residence event and she used her body in her wheelchair to actually move to this Hispanic music and she was moving her arms and so on […] and then another occasion she was just dancing on her two feet in a lounge with a male caregiver, and then he finished dancing with her and she went over to another caregiver who was sitting in a chair and she put her hands out like this and she got the care assistant up to dance with her, just very gently (participant 11 – primary informal caregiver). |
| I'm one of the people that does lots of escorts, so I take residents out on appointments or to shopping trips […] So if somebody wants to go out and buy some perfume, I'll take them to the shops (person 5 – wellbeing companion). |
| I deal a lot with the family because I'm in their room and I do FaceTime people [family members or friends of the resident] (person 5 – wellbeing companion). |
| They [residents] like to feel like you love them, not just by caring, showing your emotion to them. […] having a good talk, cup of tea, anything, something else with them. Let's go do something outside” (participant 4 – care assistant). |
| In the morning I go around, and I give the residents tea and coffee and that's really nice because that gives me a chance to say hello to lots of people (participant 6 – wellbeing companion). |
| [As former care assistant] I used to love, giving them [residents] a bit of extra time, making them laugh, listening to them, if they were feeling depressed or down. So now it's actually become my job to do that. And it's amazing. It's absolutely amazing (participant 6 – wellbeing companion). |
| I always feel like I've left them [residents] happier than when I went in, so I get a lot of reward from that (participant 5 – wellbeing companion). |
| I'm employed to come in two afternoons a week, and I mostly spend that one to one with residents. I take a service once a month and occasionally other that a communion service, occasionally other services (participant 15 – chaplain). |
| If I know they have a Christian faith, I have a way in immediately to be able to try and encourage them and assure them. I can do that through versus from the Bible. I can do that in various ways. If they're not, then we try and talk through why they might be feeling the way they are at this particular point in time. Try and get them to talk about, you know, if there's anything that might be troubling them. (participant 15 – chaplain). |
| Near to the end, some would want me. There would even ask for me even to come in when I'm you know, especially (participant 15 – chaplain). |
| Subtheme: Prioritizing Psychosocial Strategies to Deal with Anxiety, Agitation, and Depression |
| Medication would be the last resort because we [nursing home staff] need to try and use everything that we have and to persuade and to reassure them [referring to residents] … if everything fails then only we give medications that's prescribed (participant 10 – nurse). |
| Just holding their [resident’s] hand and saying, well, ok, let's just calm down and let's just stop what we're doing (participant 7 – wellbeing companion). |
| It's all about distraction and obviously if they're still getting quite agitated, then obviously for their mental state, I would then take them from the room. But a lot of the times, 9 times out of 10, a little bit of distraction, a little bit of support […] I could have 25 people in the room if I can see someone is upset or distressed or getting anxious regardless of what's going on, and the amount of people in there, I will make a point of going over to them, holding their hand and just being there for them and just helping to calm them. Then I will sit and spend more one-on-one time with them assisting them with whatever it is that they're trying to do (participant 7 –wellbeing companion). |
| I'll always put myself on their [residents’] level first and I'll say come on, talk to me. Let them open up to me first and I'll say right. Do you know what you need? You need to change your scenery (participant 7 –wellbeing companion). |
| Give something else to think about rather than worrying what might be happening to them [residents]. Or if they're not feeling very well, so it's just watching TV with them holding their hands or looking out the window or telling them what I saw on my way to work (participant 5 – wellbeing companion). |
| All of them [residents] cry a bit, but if you sit with them, we [staff members] reassure them and sometimes [...] we give them a hug. You talk to them, you sit down, have a cup of tea. They like that sort of thing, have a cup of tea with them, and they feel much better. You would be surprised how much they change (participant 4 – care assistant). |
| Some nice touch and reassurance (participant 3 – care assistant). |
| Make them [residents] cry for a little bit and just keep them a hand, and just say, don't worry, darling, we are here with you. We are helping you. You are in the nursing home and you know we are your friend (participant 1 – care assistant). |
| We have a resident who can be very anxious and sometimes if she's very anxious, I think they have phoned me up in the past and asked me to come in and see them, yeah (participant 15 – chaplain). |
| **Theme: Welcoming Criticism and Striving for Improvement** |
| There's a complaints folder (participant 11 – primary informal caregiver). |
| We have a good suggestion box (participant 9 – manager). |
| We've got daily meetings with our heads of departments where we discuss, but also separated meetings with any department every few months where we discuss and identify any form of change that we want to implement or give people resources or just really brainstorm discussions (participant 9 – manager). |
| We've done twice quality improvement weeks where I'm involving staff and residents (participant 9 – manager). |
| As my mother's condition developed, I became more and more concerned and hit my head against a brick wall about will you do something about making sure that this door cannot be opened by my mother because she'd had this horrible fall and I thought, what if she does? It's very narrow, winding. You've got the picture. I should think, I thought just one day in her head, whatever's going on, she decides to go down there and she breaks her neck. That was my worst-case scenario and I just thought this is going to be really bad for a lots of reasons. I was also thinking about [the nursing home], and I just bashed my head against a brick wall. Eventually they decided to put a gate in. Thank goodness. But even then, on weekends, I noticed I come, and it wasn't always closed (participant 11 – informal caregiver). |
| We've done a lot of adjustments... as you know, with dementia training, they say things with color on the people with dementia. So some of our cutleries is colorful the door toilet stickers are yellow or green. So we try to incorporate all the colors that we've been taught that attract people with dementia that they can see. We've incorporated different cutlery, different cups, uh different activities that suit every level of dementia. I feel like with us, we are getting there. We are on our we are on the track.  We're running and anything else that we can learn that's new, we embrace it (Participant 14 – clinical lead nurse). |
| **Theme: Fostering Wellbeing Among Staff** |
| I do regular wellness chats with the staff. We've done 50 this year so far, and I'm very grateful that actually staff members wants to come because it's optional (participant 9 – manager). |
| Our duty manager, we can talk with her about everything. She's open mind. And every time you have a problem, or you have an issue, you can talk to her (participant 1 – care assistant). |
| It's a pleasure to work for owners that genuinely care not only about residents, but the staff too (participant 9 – manager). |
| I just don't feel, never feel overwhelmed or that I'm not getting enough support (participant 7 –wellbeing companion). |
| I did keep an eye out for them [care assistants] and I do. I do check that they're all right (participant 6 – wellbeing companion). |
| Throughout years of working with them [nursing home staff], I've tried for them to make sure that they understand that they're contributing to something bigger, however small it might be. Because, I think every person in every department is equally important, and we need to start with appreciation, but also putting ourselves in the role of another person without being judgmental. And I do talks, appraisals, supervision and I'm more probably using a bit of the coaching model and in trying for them to pick up the best from ourselves as well. So that delivery of care is better, but also emphasizing that if you care for residents, you also need to understand how to care about each other, because I think that […] when you care for someone, you also need to care for your colleagues (participant 9 – manager). |
| We're here as a whole (participant 7 –wellbeing companion). |
| It doesn't feel like we are in an agency now. It's just like a family (participant 3 – care assistant). |
| I personally feel very lucky. blessed to be able to take care of someone else's mom, dad, aunt uncle (participant 14 – clinical lead nurse). |
| They [in the nursing home] used to have a counsellor who came in once a week, but she's more on the edge of things now and I think they would call her in if they needed her. Having a counsellor all the time and it comes very expensive. I used to talk to her a bit and we did some things together with staff. I hope that the staff would feel they could talk to me as well now that a lot of them have got to know me (participant 15 – chaplain). |
